# Supplementary material for: Transcriptional mechanisms underlying sensitization of peripheral sensory neurons by Granulocyte-/Granulocyte-macrophage colony stimulating factors
Source: PubMed Central journal article supplement (PMC3852053; doi:10.1186/1744-8069-9-48), 2013-09-25

Mechanical Sensitivity

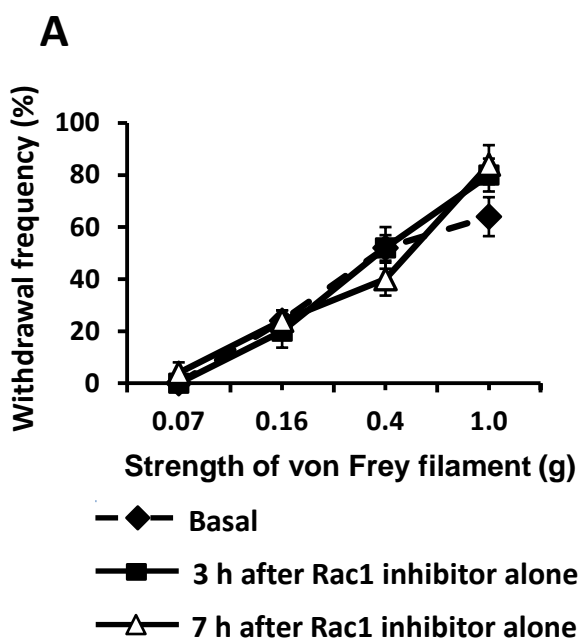

Heat Sensitivity

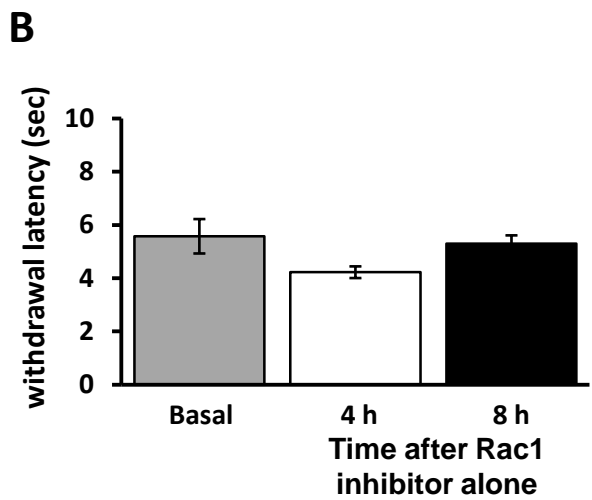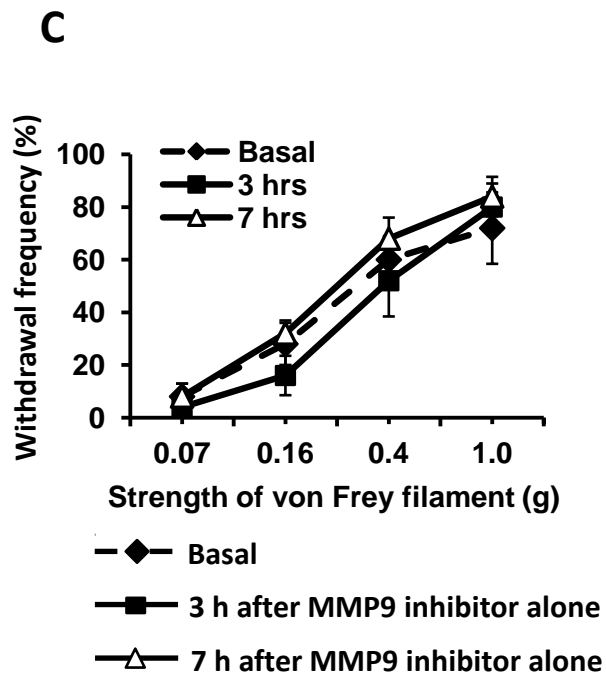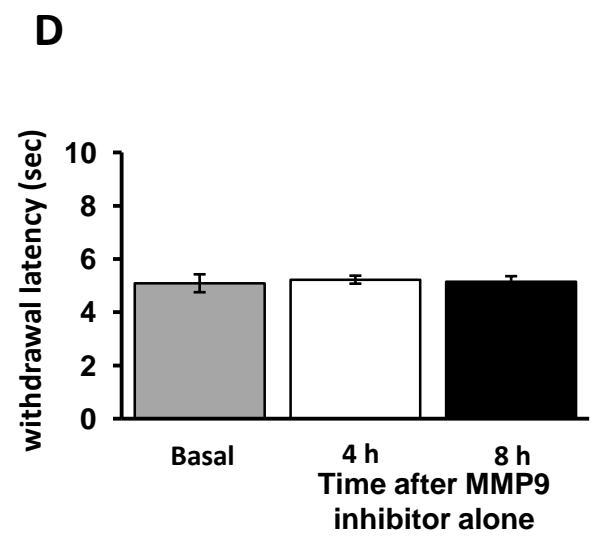

Supplement: 1744-8069-9-48-S9.pdf [file 1744-8069-9-48-S9.pdf]
